# Supplementary material
Source: PubMed Central journal article supplement (PMC2737740)
Supplement: NIHMS100948-supplement-S2.pdf [file NIHMS100948-supplement-S2.pdf]

Montage

Slide

Movie

Pick Particle/Categorize

Markers-Tomo

Markers-Tilt Pair

Marker File Number:

1

Click on Show/Edit marker button if this input is edited !

Key Number:

1

Offset:

0

== > Used to Save Marker Files !

Key number for origin:

1

Phi:

-90

Gamma:

-90

Theta:

0

Tilt angle area:

5000.00

Determine Theta

Fit Angles

Draw Fitted Locations

Save Angles

To Add a New Marker

: Click Left Mouse Button

To Change an Existing Marker : Drag Right Mouse Button

To Delete a Marker

: Click Middle Mouse Button

**Renumber Markers After Delete**

Show/Edit Marker

Save Marker Files

Hide Markers

Unhide Markers
