# Supplementary material
Source: PubMed Central journal article supplement (PMC2737740)
Supplement: NIHMS100948-supplement-S3.pdf [file NIHMS100948-supplement-S3.pdf]

|                                                 |                                      |                                                  |                                 |                                                                          |                                               |
|-------------------------------------------------|--------------------------------------|--------------------------------------------------|---------------------------------|--------------------------------------------------------------------------|-----------------------------------------------|
| <b>Montage</b>                                  | <b>Slide</b>                         | <b>Movie</b>                                     | <b>Pick Particle/Categorize</b> | <b>Markers-Tomo</b>                                                      | <b>Markers-Tilt Pair</b>                      |
| <b>Marker File Number:</b>                      |                                      | <input type="text" value="0"/>                   |                                 | Click on Show/Edit marker button if this input is edited !               |                                               |
| <b>Key Number:</b>                              | <input type="text" value="1"/>       |                                                  | <b>Offset:</b>                  | <input type="text" value="0"/>                                           | == > Used to Save Marker Files !              |
| <b>Key number for origin:</b>                   |                                      |                                                  |                                 | <input type="text" value="1"/>                                           |                                               |
| <b>Phi:</b>                                     | <input type="text" value="-90"/>     |                                                  | <b>Gamma:</b>                   | <input type="text" value="-90"/>                                         | <b>Theta:</b> <input type="text" value="0"/>  |
| <b>Tilt angle area:</b>                         | <input type="text" value="5000.00"/> |                                                  |                                 |                                                                          |                                               |
| <input type="button" value="Determine Theta"/>  |                                      | <input type="button" value="Fit Angles"/>        |                                 | <input type="button" value="Draw Fitted Locations"/>                     | <input type="button" value="Save Angles"/>    |
| To Add a New Marker                             |                                      | : Click Left Mouse Button                        |                                 | To Change an Existing Marker                                             | : Drag Right Mouse Button                     |
| To Delete a Marker                              |                                      | : Click Middle Mouse Button                      |                                 | <input checked="" type="checkbox"/> <b>Renumber Markers After Delete</b> |                                               |
| <input type="button" value="Show/Edit Marker"/> |                                      | <input type="button" value="Save Marker Files"/> |                                 | <input type="button" value="Hide Markers"/>                              | <input type="button" value="Unhide Markers"/> |
