# Supplementary material
Source: PubMed Central journal article supplement (PMC2737740)
Supplement: NIHMS100948-supplement-S4.pdf [file NIHMS100948-supplement-S4.pdf]

Montage

Slide

Movie

Pick Particle / Categorize

Markers - Tomo

Markers - Tilt Pair

Doc. File Name:

nonlines/coran/cat\_avgs.dat

Pick A Set of Particles

Pick Individual particles

Starting Key No. :

1

No. of Categories:

1 ▼

START
