# Supplementary material
Source: PubMed Central journal article supplement (PMC2737740)

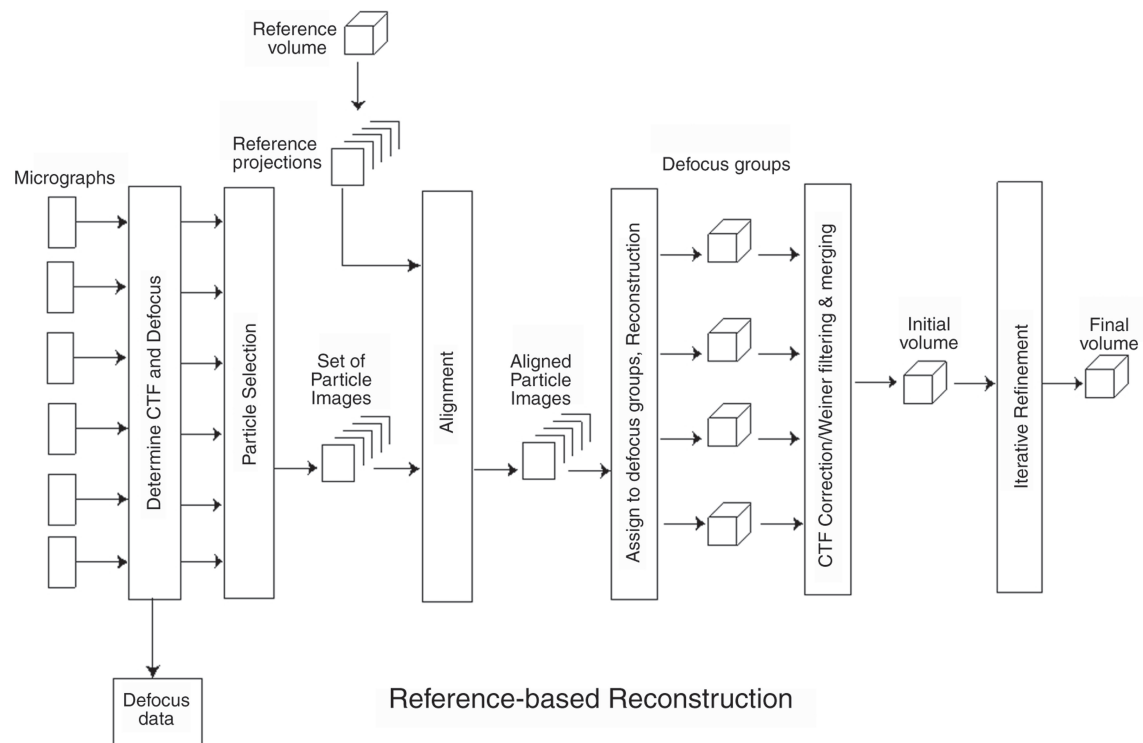

Supplement: NIHMS100948-supplement-S1.pdf [file NIHMS100948-supplement-S1.pdf]
